# Supplementary material for: The Impact of the Oil Phase Selection on Physicochemical Properties, Long-Term Stability, In Vitro Performance and Injectability of Curcumin-Loaded PEGylated Nanoemulsions
Source: MDPI journal article supplement (doi:10.3390/pharmaceutics14081666), 2022-08-10
Supplement: s1 [file s1]

## Supplementary material

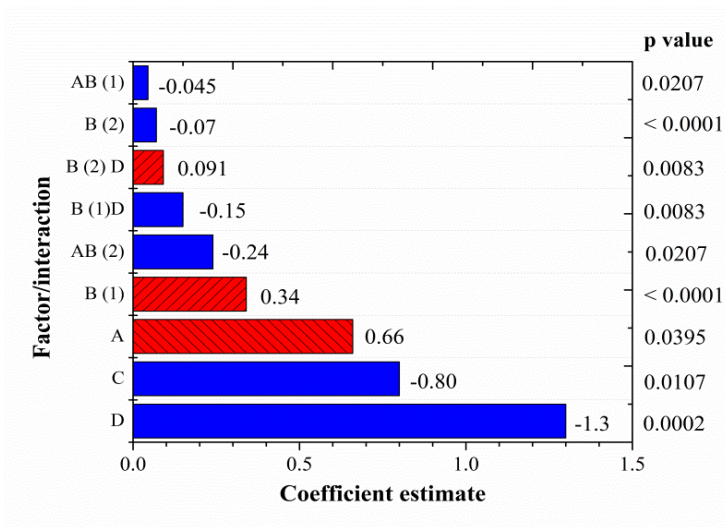

(a)

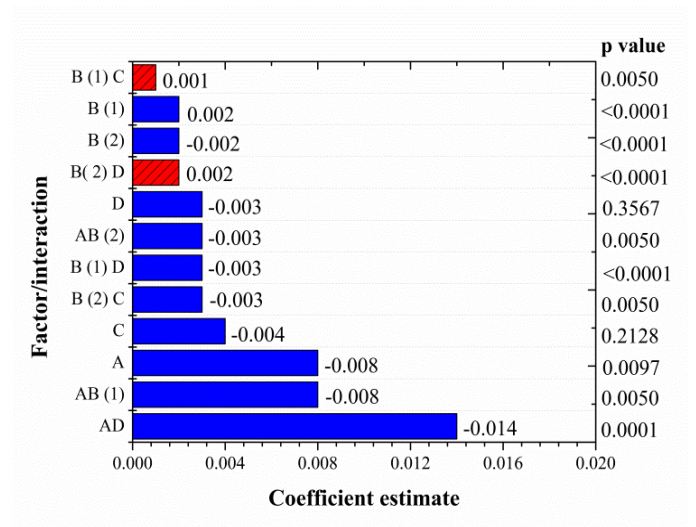

(b)

**Figure S1.** Plots for: a) Z-ave – mean droplet size and b) PDI - polydispersity index, with the coefficient and p values for the factors and their interactions. A: PEG-PL type; B: PEG-PL concentration; C- oil type and D: the presence of curcumin.

**Table S1.** Results of laser diffraction (LD) measurements for soybean oil formulations stored at room temperature for two years.

| <b>Formulations</b> | <b>d (10)<br/>(nm)</b> | <b>d (50)<br/>(nm)</b> | <b>d (90)<br/>(nm)</b> | <b>D [4,3]<br/>(nm)</b> |
|---------------------|------------------------|------------------------|------------------------|-------------------------|
| <b>PS</b>           | 78                     | 116                    | 173                    | 122                     |
| <b>CS</b>           | 78                     | 117                    | 173                    | 122                     |
| <b>S21</b>          | 76                     | 114                    | 173                    | 120                     |
| <b>CS21</b>         | 76                     | 113                    | 168                    | 118                     |
| <b>S23</b>          | 74                     | 109                    | 163                    | 115                     |
| <b>CS23</b>         | 75                     | 112                    | 166                    | 117                     |
| <b>S26</b>          | 74                     | 109                    | 163                    | 115                     |
| <b>CS26</b>         | 75                     | 111                    | 165                    | 117                     |
| <b>S51</b>          | 76                     | 113                    | 169                    | 118                     |
| <b>CS51</b>         | 76                     | 113                    | 168                    | 118                     |
| <b>S53</b>          | 74                     | 109                    | 164                    | 115                     |
| <b>CS53</b>         | 75                     | 112                    | 167                    | 117                     |
| <b>S56</b>          | 73                     | 106                    | 159                    | 112                     |
| <b>CS56</b>         | 76                     | 112                    | 166                    | 117                     |

**Table S2.** Results of laser diffraction (LD) measurements for fish oil formulations stored at room temperature for two years.

| <b>Formulations</b> | <b>d (10)<br/>(nm)</b> | <b>d (50)<br/>(nm)</b> | <b>d (90)<br/>(nm)</b> | <b>D [4,3]<br/>(nm)</b> |
|---------------------|------------------------|------------------------|------------------------|-------------------------|
| <b>PF</b>           | 224                    | 309                    | 421                    | 317                     |
| <b>CF</b>           | 78                     | 116                    | 173                    | 121                     |
| <b>F21</b>          | 74                     | 109                    | 163                    | 115                     |
| <b>CF21</b>         | 76                     | 112                    | 167                    | 118                     |
| <b>F23</b>          | 73                     | 106                    | 159                    | 112                     |
| <b>CF23</b>         | 76                     | 114                    | 171                    | 120                     |
| <b>F26</b>          | 74                     | 109                    | 162                    | 114                     |
| <b>CF26</b>         | 76                     | 112                    | 167                    | 117                     |
| <b>F51</b>          | 76                     | 112                    | 167                    | 118                     |
| <b>CF51</b>         | 76                     | 113                    | 168                    | 118                     |
| <b>F53</b>          | 79                     | 122                    | 207                    | 1378                    |
| <b>CF53</b>         | 76                     | 112                    | 167                    | 117                     |
| <b>F56</b>          | 79                     | 120                    | 195                    | 1897                    |
| <b>CF56</b>         | 76                     | 112                    | 167                    | 117                     |

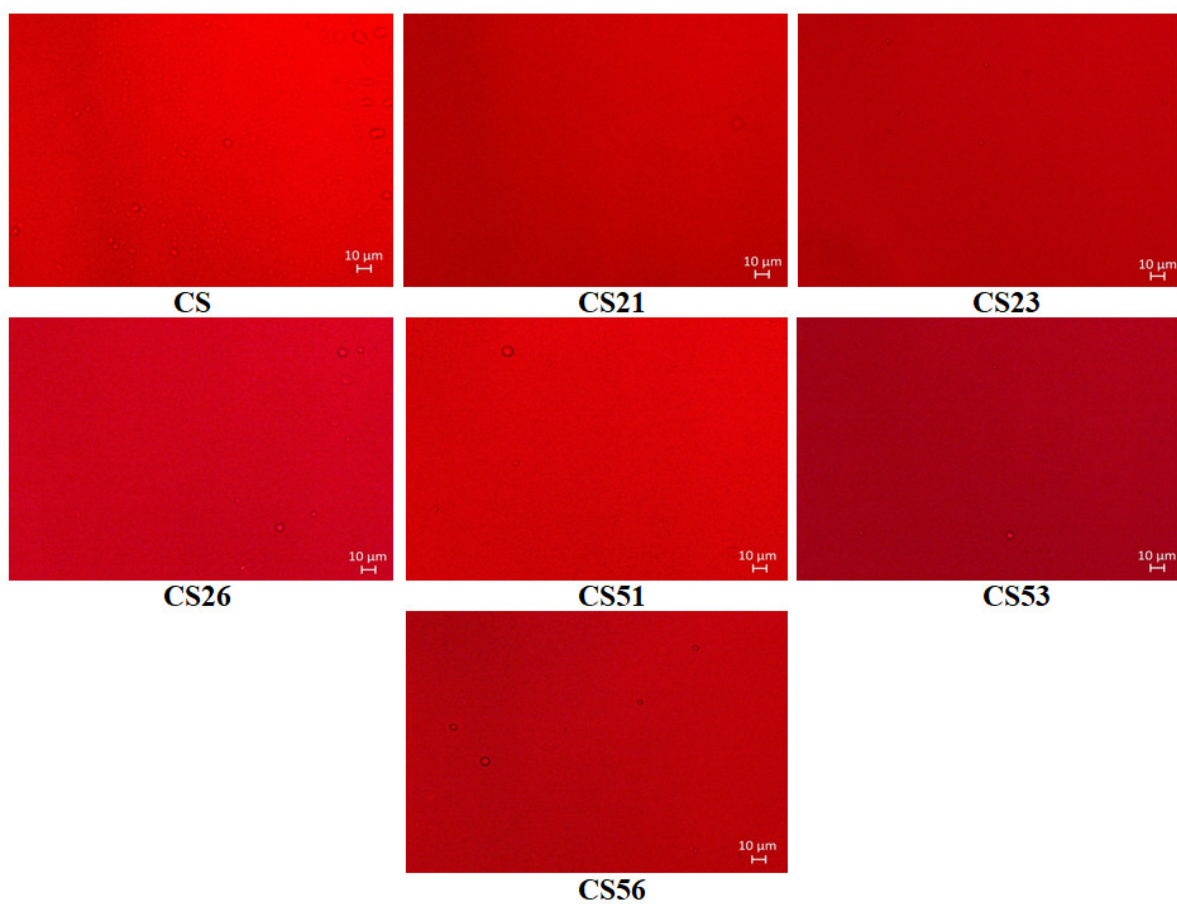

**Figure S2.** Polarization microscopy images of the curcumin-loaded soybean oil NEs taken after two years of storage.

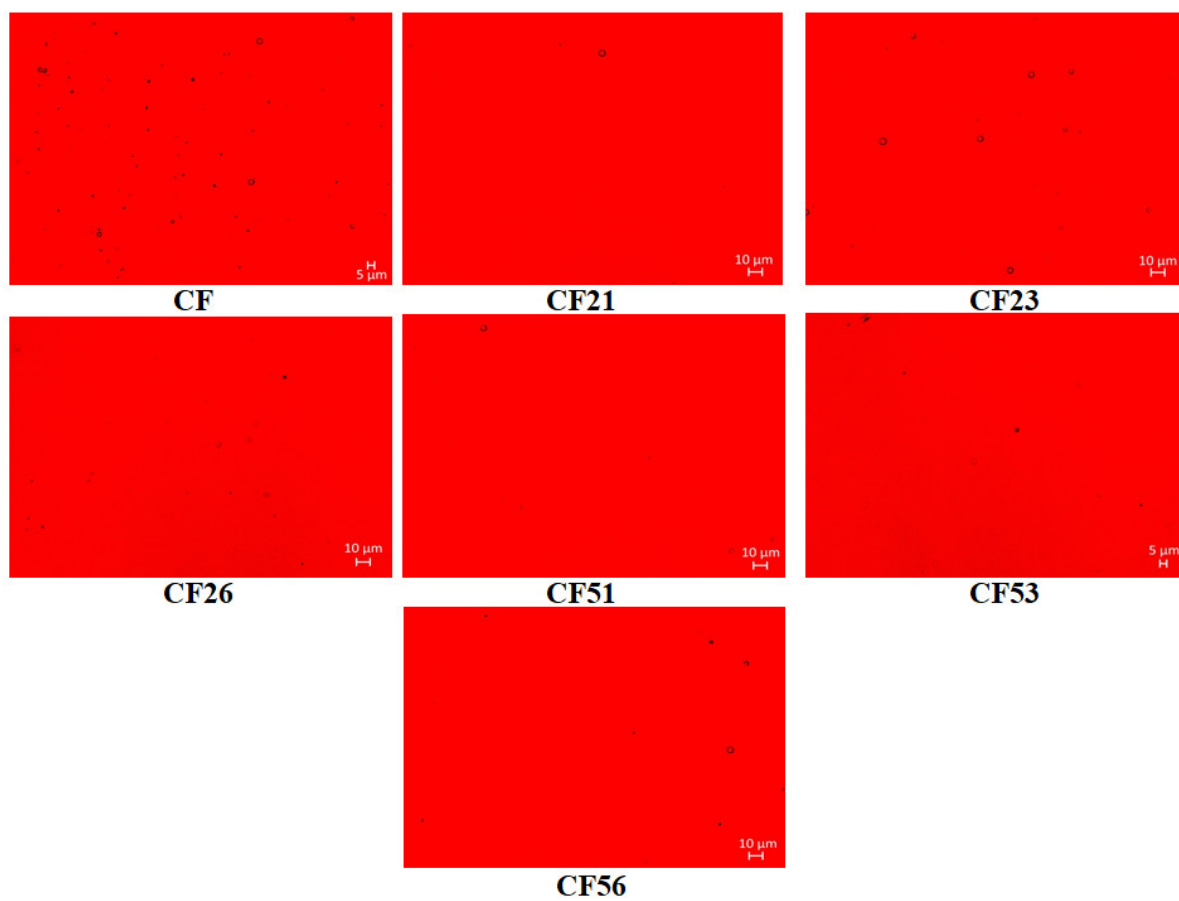

**Figure S3.** Polarization microscopy images of the curcumin-loaded fish oil NEs taken after two years of storage.

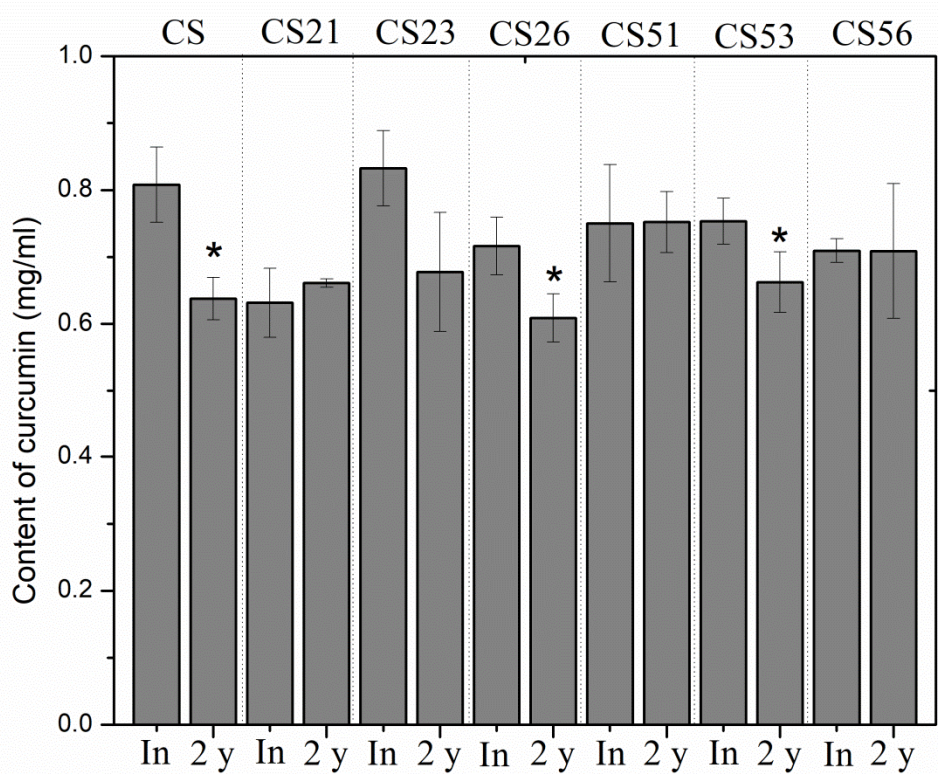

**Figure S4.** Content of curcumin in soybean oil nanoemulsions measured initially (In) and after two years of storage (2y); Values are shown as means  $\pm$  sd (n = 3); \*, p < 0.05, compared to the initially measured values.



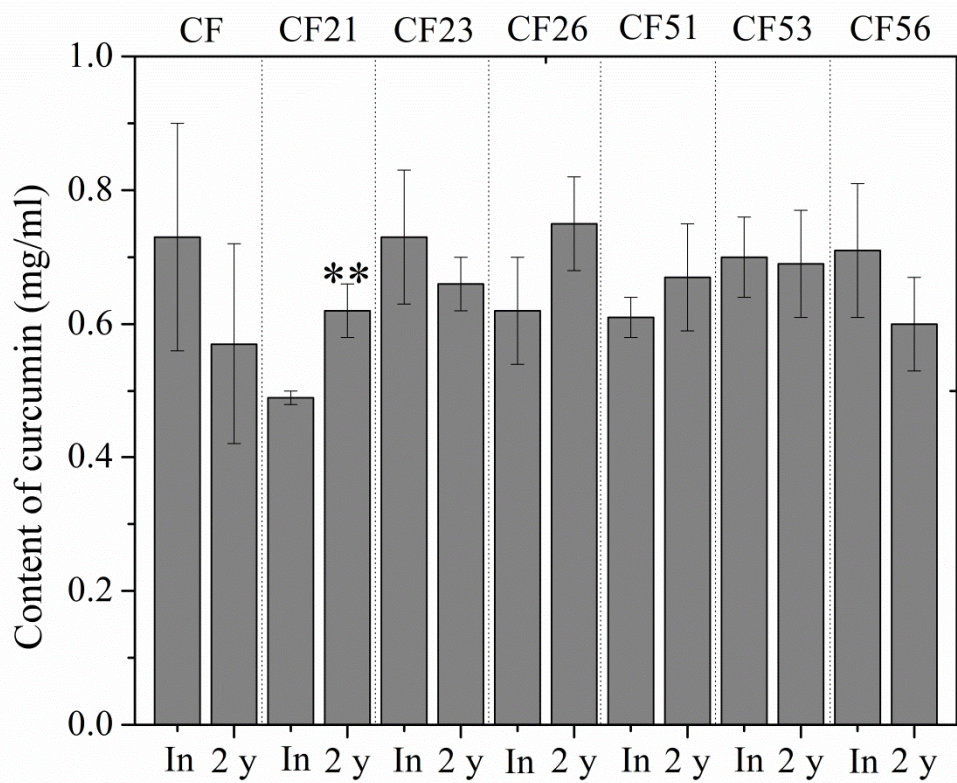

**Figure S5.** Content of curcumin in fish oil nanoemulsions measured initially (In) and after two years of storage (2y); Values are shown as means  $\pm$  sd (n = 3); \*\*, p < 0.01, compared to the initially measured values.

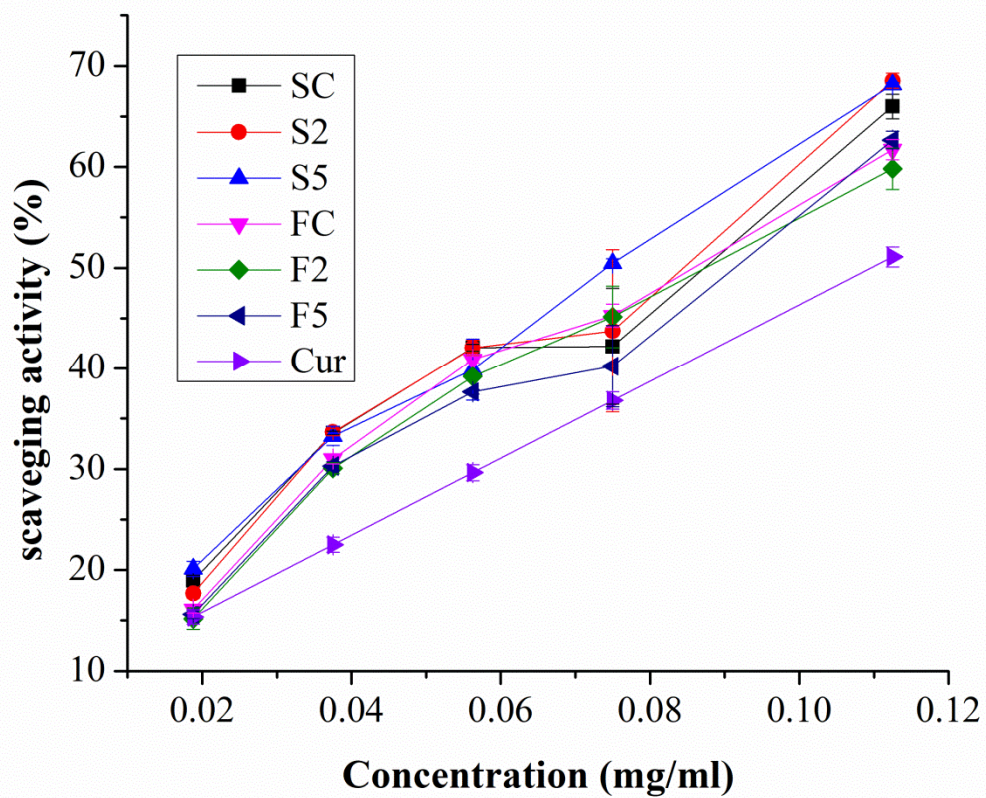

**Figure S6.** DPPH assay results for freshly prepared nanoemulsions with soybean oil (SC, S21, S51), fish oil (FC, F21, F51) and pure curcumin (Cur).



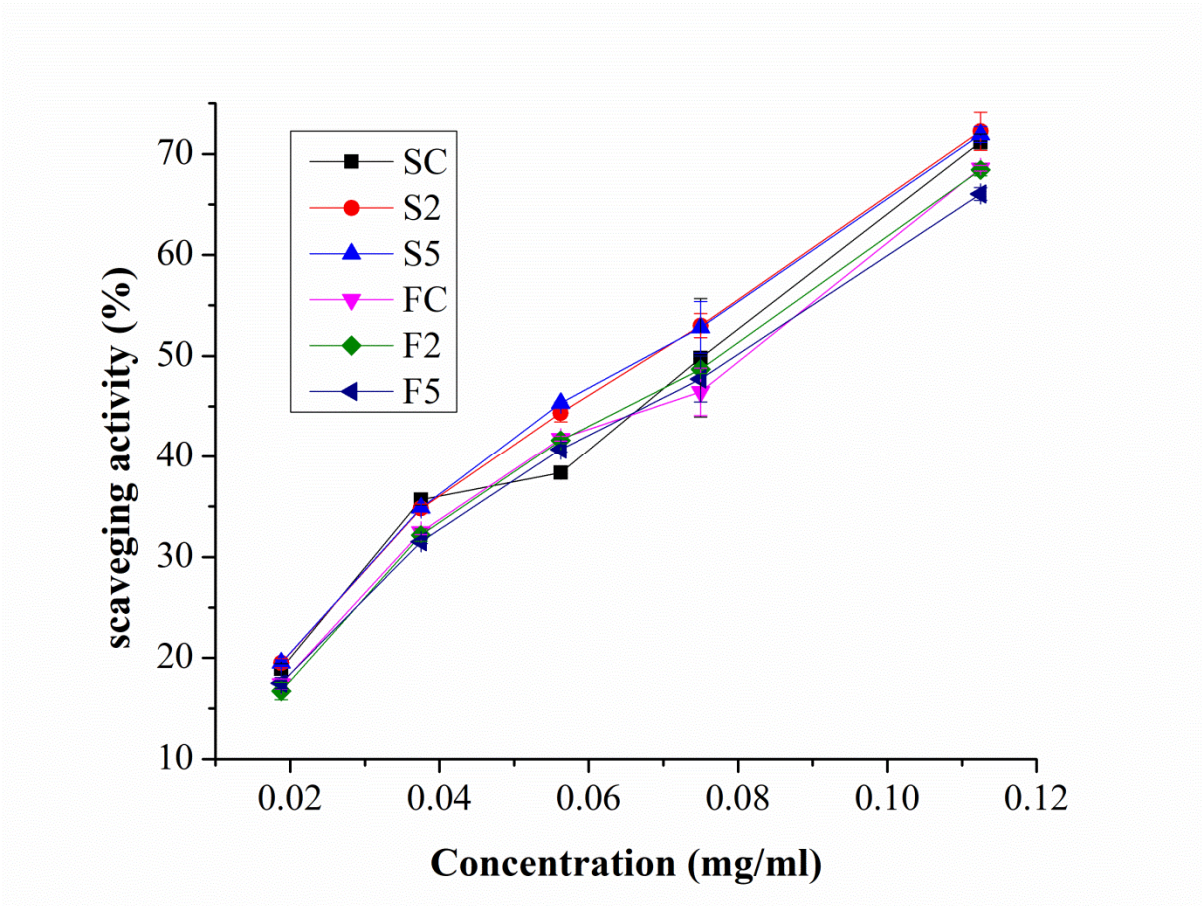

**Figure S7.** DPPH assay results for nanoemulsions with soybean oil (SC, S21, S51) and fish oil (FC, F21, F51) after two years of storage.

**Table S3.** Dissolution modelling for non-PEGylated formulations.

|                  | Formulations                                                                                                            |                                                                                                                                              |
|------------------|-------------------------------------------------------------------------------------------------------------------------|----------------------------------------------------------------------------------------------------------------------------------------------|
|                  | CS                                                                                                                      | CF                                                                                                                                           |
| Zero order       | <b>K = 0.100</b><br><b>R<sup>2</sup> = 0.9918</b><br><b>R<sup>2</sup><sub>adj</sub> = 0.9918</b><br><b>AIC = 8.7911</b> | K = 0.250<br>R <sup>2</sup> = 0.9930<br>R <sup>2</sup> <sub>adj</sub> = 0.9930<br>AIC = 17.8459                                              |
| First order      | K = 0.001<br>R <sup>2</sup> = 0.9907<br>R <sup>2</sup> <sub>adj</sub> = 0.9907<br>AIC = 10.0073                         | K = 0.003<br>R <sup>2</sup> = 0.9581<br>R <sup>2</sup> <sub>adj</sub> = 0.9851<br>AIC = 23.3072                                              |
| Higuchi          | K = 1.198<br>R <sup>2</sup> = 0.8009<br>R <sup>2</sup> <sub>adj</sub> = 0.8009<br>AIC = 28.3909                         | K = 3.031<br>R <sup>2</sup> = 0.8278<br>R <sup>2</sup> <sub>adj</sub> = 0.8278<br>AIC = 38.0503                                              |
| Baker-Lonsdale   | K = 0.000<br>R <sup>2</sup> = 0.7883<br>R <sup>2</sup> <sub>adj</sub> = 0.7883<br>AIC = 28.7596                         | K = 0.000<br>R <sup>2</sup> = 0.7914<br>R <sup>2</sup> <sub>adj</sub> = 0.7914<br>AIC = 39.2015                                              |
| Korsmeyer-Peppas | K = 0.095<br>N = 1.013<br>R <sup>2</sup> = 0.9925<br>R <sup>2</sup> <sub>adj</sub> = 0.9906<br>AIC = 10.2221            | <b>K = 0.325</b><br><b>N = 0.952</b><br><b>R<sup>2</sup> = 0.9945</b><br><b>R<sup>2</sup><sub>adj</sub> = 0.9931</b><br><b>AIC = 18.5235</b> |
| Hixson-Crowell   | K = 0.000<br>R <sup>2</sup> = 0.9916<br>R <sup>2</sup> <sub>adj</sub> = 0.9916<br>AIC = 9.2999                          | K = 0.001<br>R <sup>2</sup> = 0.9927<br>R <sup>2</sup> <sub>adj</sub> = 0.9927<br>AIC = 19.0848                                              |

**Table S4.** Dissolution modelling for PEGylated formulations containing PEG2000-DSPE.

|                  | Formulations                           |                                             |                                             |                                             |                                             |                                             |
|------------------|----------------------------------------|---------------------------------------------|---------------------------------------------|---------------------------------------------|---------------------------------------------|---------------------------------------------|
|                  | CS21                                   | CS23                                        | CS26                                        | CF21                                        | CF23                                        | CF26                                        |
| Zero order       | K = 0.101                              | <b>K = 0.105</b>                            | K = 0.082                                   | K = 0.282                                   | <b>K = 0.382</b>                            | <b>K = 0.324</b>                            |
|                  | R <sup>2</sup> = 0.9894                | <b>R<sup>2</sup> = 0.9907</b>               | R <sup>2</sup> = 0.9640                     | R <sup>2</sup> = 0.9911                     | <b>R<sup>2</sup> = 0.9876</b>               | <b>R<sup>2</sup> = 0.9956</b>               |
|                  | R <sup>2</sup> <sub>adj</sub> = 0.9894 | <b>R<sup>2</sup><sub>adj</sub> = 0.9907</b> | R <sup>2</sup> <sub>adj</sub> = 0.9640      | R <sup>2</sup> <sub>adj</sub> = 0.9911      | <b>R<sup>2</sup><sub>adj</sub> = 0.9876</b> | <b>R<sup>2</sup><sub>adj</sub> = 0.9956</b> |
|                  | AIC = 10.4473                          | <b>AIC = 10.5040</b>                        | AIC = 14.5805                               | AIC = 20.6449                               | <b>AIC = 26.3692</b>                        | <b>AIC = 18.5561</b>                        |
| First order      | K = 0.001                              | K = 0.001                                   | K = 0.001                                   | K = 0.004                                   | K = 0.006                                   | K = 0.005                                   |
|                  | R <sup>2</sup> = 0.9860                | R <sup>2</sup> = 0.9896                     | R <sup>2</sup> = 0.9546                     | R <sup>2</sup> = 0.9471                     | R <sup>2</sup> = 0.9434                     | R <sup>2</sup> = 0.9535                     |
|                  | R <sup>2</sup> <sub>adj</sub> = 0.9860 | R <sup>2</sup> <sub>adj</sub> = 0.9896      | R <sup>2</sup> <sub>adj</sub> = 0.9546      | R <sup>2</sup> <sub>adj</sub> = 0.9471      | R <sup>2</sup> <sub>adj</sub> = 0.9434      | R <sup>2</sup> <sub>adj</sub> = 0.9535      |
|                  | AIC = 12.7480                          | AIC = 10.9469                               | AIC = 16.4633                               | AIC = 31.9855                               | AIC = 36.5120                               | AIC = 33.4300                               |
| Higuchi          | K = 1.205                              | K = 1.254                                   | K = 0.960                                   | K = 3.351                                   | K = 4.627                                   | K = 3.904                                   |
|                  | R <sup>2</sup> = 0.7860                | R <sup>2</sup> = 0.7996                     | R <sup>2</sup> = 0.7129                     | R <sup>2</sup> = 0.7756                     | R <sup>2</sup> = 0.8206                     | R <sup>2</sup> = 0.8086                     |
|                  | R <sup>2</sup> <sub>adj</sub> = 0.7860 | R <sup>2</sup> <sub>adj</sub> = 0.7996      | R <sup>2</sup> <sub>adj</sub> = 0.7129      | R <sup>2</sup> <sub>adj</sub> = 0.7756      | R <sup>2</sup> <sub>adj</sub> = 0.8206      | R <sup>2</sup> <sub>adj</sub> = 0.8086      |
|                  | AIC = 29.1103                          | AIC = 28.9471                               | AIC = 28.8838                               | AIC = 41.5504                               | AIC = 43.5013                               | AIC = 41.9425                               |
| Baker-Lonsdale   | K = 0.000                              | K = 0.000                                   | K = 0.000                                   | K = 0.000                                   | K = 0.000                                   | K = 0.000                                   |
|                  | R <sup>2</sup> = 0.7732                | 0.7863R <sup>2</sup> =                      | R <sup>2</sup> = 0.7023                     | R <sup>2</sup> = 0.7317                     | R <sup>2</sup> = 0.7565                     | R <sup>2</sup> = 0.7560                     |
|                  | R <sup>2</sup> <sub>adj</sub> = 0.7732 | R <sup>2</sup> <sub>adj</sub> = 0.7863      | R <sup>2</sup> <sub>adj</sub> = 0.7023      | R <sup>2</sup> <sub>adj</sub> = 0.7317      | R <sup>2</sup> <sub>adj</sub> = 0.7565      | R <sup>2</sup> <sub>adj</sub> = 0.7560      |
|                  | AIC = 29.4613                          | AIC = 29.3340                               | AIC = 29.1155                               | AIC = 42.6221                               | AIC = 45.3473                               | AIC = 43.4036                               |
| Korsmeyer-Peppas | <b>K = 0.080</b>                       | K = 0.100                                   | <b>K = 0.031</b>                            | <b>K = 0.178</b>                            | K = 0.494                                   | K = 0.315                                   |
|                  | <b>N = 1.050</b>                       | N = 1.014                                   | <b>N = 1.300</b>                            | <b>N = 1.096</b>                            | N = 0.959                                   | N = 1.008                                   |
|                  | <b>R<sup>2</sup> = 0.9913</b>          | R <sup>2</sup> = 0.9917                     | <b>R<sup>2</sup> = 0.9924</b>               | <b>R<sup>2</sup> = 0.9965</b>               | R <sup>2</sup> = 0.9901                     | R <sup>2</sup> = 0.9958                     |
|                  | R <sup>2</sup> <sub>adj</sub> = 0.9891 | R <sup>2</sup> <sub>adj</sub> = 0.9896      | <b>R<sup>2</sup><sub>adj</sub> = 0.9905</b> | <b>R<sup>2</sup><sub>adj</sub> = 0.9956</b> | R <sup>2</sup> <sub>adj</sub> = 0.9876      | R <sup>2</sup> <sub>adj</sub> = 0.9948      |
|                  | <b>AIC = 9.7759</b>                    | AIC = 11.8500                               | <b>AIC = 7.2300</b>                         | <b>AIC = 18.4773</b>                        | AIC = 27.5574                               | AIC = 20.2089                               |
| Hixson-Crowell   | K = 0.000                              | K = 0.000                                   | K = 0.000                                   | K = 0.001                                   | K = 0.002                                   | K = 0.001                                   |
|                  | R <sup>2</sup> = 0.9877                | R <sup>2</sup> = 0.9906                     | R <sup>2</sup> = 0.9580                     | R <sup>2</sup> = 0.9660                     | R <sup>2</sup> = 0.9695                     | R <sup>2</sup> = 0.9746                     |
|                  | R <sup>2</sup> <sub>adj</sub> = 0.9877 | R <sup>2</sup> <sub>adj</sub> = 0.9906      | R <sup>2</sup> <sub>adj</sub> = 0.9580      | R <sup>2</sup> <sub>adj</sub> = 0.9660      | R <sup>2</sup> <sub>adj</sub> = 0.9695      | R <sup>2</sup> <sub>adj</sub> = 0.9746      |
|                  | AIC = 11.8910                          | AIC = 10.4372                               | AIC = 15.8103                               | AIC = 29.0151                               | AIC = 32.7449                               | AIC = 29.7493                               |

**Table S5.** Dissolution modelling for PEGylated formulations containing PEG5000-DPPE.

|                  | Formulations                                |                                             |                                             |                                             |                                             |                                             |
|------------------|---------------------------------------------|---------------------------------------------|---------------------------------------------|---------------------------------------------|---------------------------------------------|---------------------------------------------|
|                  | CS51                                        | CS53                                        | CS56                                        | CF51                                        | CF53                                        | CF56                                        |
| Zero order       | K = 0.120                                   | K = 0.414                                   | K = 0.147                                   | <b>K = 0.308</b>                            | <b>K = 0.374</b>                            | <b>K = 0.434</b>                            |
|                  | R <sup>2</sup> = 0.9614                     | R <sup>2</sup> = 0.9752                     | R <sup>2</sup> = 0.9767                     | <b>R<sup>2</sup> = 0.9929</b>               | <b>R<sup>2</sup> = 0.9848</b>               | <b>R<sup>2</sup> = 0.9931</b>               |
|                  | R <sup>2</sup> <sub>adj</sub> = 0.9614      | R <sup>2</sup> <sub>adj</sub> = 0.9752      | R <sup>2</sup> <sub>adj</sub> = 0.9767      | <b>R<sup>2</sup><sub>adj</sub> = 0.9929</b> | <b>R<sup>2</sup><sub>adj</sub> = 0.9848</b> | <b>R<sup>2</sup><sub>adj</sub> = 0.9931</b> |
|                  | AIC = 21.0680                               | AIC = 20.6748                               | AIC = 20.7972                               | <b>AIC = 21.5793</b>                        | <b>AIC = 28.5973</b>                        | <b>AIC = 25.2423</b>                        |
| First order      | K = 0.001                                   | K = 0.002                                   | K = 0.002                                   | K = 0.004                                   | K = 0.006                                   | K = 0.007                                   |
|                  | R <sup>2</sup> = 0.9435                     | R <sup>2</sup> = 0.9559                     | R <sup>2</sup> = 0.9581                     | R <sup>2</sup> = 0.9686                     | R <sup>2</sup> = 0.9176                     | R <sup>2</sup> = 0.8965                     |
|                  | R <sup>2</sup> <sub>adj</sub> = 0.9435      | R <sup>2</sup> <sub>adj</sub> = 24.2330     | R <sup>2</sup> <sub>adj</sub> = 0.9581      | R <sup>2</sup> <sub>adj</sub> = 0.9686      | R <sup>2</sup> <sub>adj</sub> = 0.9176      | R <sup>2</sup> <sub>adj</sub> = 0.8965      |
|                  | AIC = 23.5581                               | AIC = 24.2330                               | AIC = 24.3848                               | AIC = 30.1040                               | AIC = 38.9857                               | AIC = 41.9234                               |
| Higuchi          | K = 1.389                                   | K = 1.648                                   | K = 1.713                                   | K = 3.728                                   | K = 4.457                                   | K = 5.202                                   |
|                  | R <sup>2</sup> = 0.6986                     | R <sup>2</sup> = 0.7237                     | R <sup>2</sup> = 0.7298                     | R <sup>2</sup> = 0.8196                     | R <sup>2</sup> = 0.7780                     | R <sup>2</sup> = 0.7951                     |
|                  | R <sup>2</sup> <sub>adj</sub> = 0.6986      | R <sup>2</sup> <sub>adj</sub> = 0.7237      | R <sup>2</sup> <sub>adj</sub> = 0.7298      | R <sup>2</sup> <sub>adj</sub> = 0.8196      | R <sup>2</sup> <sub>adj</sub> = 0.7780      | R <sup>2</sup> <sub>adj</sub> = 0.7951      |
|                  | AIC = 34.0295                               | AIC = 35.3250                               | AIC = 35.5760                               | AIC = 40.9533                               | AIC = 44.9222                               | AIC = 46.0397                               |
| Baker-Lonsdale   | K = 0.000                                   | K = 0.001                                   |
|                  | R <sup>2</sup> = 0.6826                     | R <sup>2</sup> = 0.7045                     | R <sup>2</sup> = 0.7099                     | R <sup>2</sup> = 0.7716                     | R <sup>2</sup> = 0.7147                     | R <sup>2</sup> = 0.7151                     |
|                  | R <sup>2</sup> <sub>adj</sub> = 0.6826      | R <sup>2</sup> <sub>adj</sub> = 0.7045      | R <sup>2</sup> <sub>adj</sub> = 0.7099      | R <sup>2</sup> <sub>adj</sub> = 0.7716      | R <sup>2</sup> <sub>adj</sub> = 0.7147      | R <sup>2</sup> <sub>adj</sub> = 0.7151      |
|                  | AIC = 34.3458                               | AIC = 35.7292                               | AIC = 36.0033                               | AIC = 42.3767                               | AIC = 46.4540                               | AIC = 48.0304                               |
| Korsmeyer-Peppas | <b>K = 0.031</b>                            | <b>K = 0.044</b>                            | <b>K = 0.051</b>                            | K = 0.366                                   | K = 0.294                                   | K = 0.377                                   |
|                  | <b>N = 1.307</b>                            | <b>N = 1.227</b>                            | <b>N = 1.201</b>                            | N = 0.971                                   | N = 1.061                                   | N = 1.034                                   |
|                  | <b>R<sup>2</sup> = 0.9899</b>               | <b>R<sup>2</sup> = 0.9920</b>               | <b>R<sup>2</sup> = 0.9903</b>               | R <sup>2</sup> = 0.9942                     | R <sup>2</sup> = 0.9877                     | R <sup>2</sup> = 0.9941                     |
|                  | <b>R<sup>2</sup><sub>adj</sub> = 0.9874</b> | <b>R<sup>2</sup><sub>adj</sub> = 0.9900</b> | <b>R<sup>2</sup><sub>adj</sub> = 0.9879</b> | R <sup>2</sup> <sub>adj</sub> = 0.9927      | R <sup>2</sup> <sub>adj</sub> = 0.9846      | R <sup>2</sup> <sub>adj</sub> = 0.9927      |
|                  | <b>AIC = 15.5387</b>                        | <b>AIC = 15.8758</b>                        | <b>AIC = 17.2340</b>                        | AIC = 22.1855                               | AIC = 29.4679                               | AIC = 25.9541                               |
| Hixson-Crowell   | K = 0.000                                   | K = 0.001                                   | K = 0.001                                   | K = 0.001                                   | K = 0.002                                   | K = 0.002                                   |
|                  | R <sup>2</sup> = 0.9501                     | R <sup>2</sup> = 0.9632                     | R <sup>2</sup> = 0.9653                     | R <sup>2</sup> = 0.9842                     | R <sup>2</sup> = 0.9483                     | R <sup>2</sup> = 0.9359                     |
|                  | R <sup>2</sup> <sub>adj</sub> = 0.9501      | R <sup>2</sup> <sub>adj</sub> = 0.9632      | R <sup>2</sup> <sub>adj</sub> = 0.9653      | R <sup>2</sup> <sub>adj</sub> = 0.9842      | R <sup>2</sup> <sub>adj</sub> = 0.9483      | R <sup>2</sup> <sub>adj</sub> = 0.9359      |
|                  | AIC = 22.7485                               | AIC = 23.1150                               | AIC = 23.2384                               | AIC = 25.5464                               | AIC = 36.1667                               | AIC = 39.0479                               |

**Table S6.** Maximum injection force (N) for soybean and fish oil nanoemulsions.

| <b>Formulations</b> | <b>Maximum injection force (Fmax)</b> |
|---------------------|---------------------------------------|
| CS                  | 19.65 ± 1.54                          |
| CS21                | 22.94 ± 0.26                          |
| CS23                | 27.66 ± 1.00                          |
| CS26                | 29.34 ± 1.20                          |
| CS51                | 25.21 ± 0.33                          |
| CS53                | 28.58 ± 2.34                          |
| CS56                | 34.60 ± 2.58                          |
| CF                  | 19.58 ± 1.55                          |
| CF21                | 23.39 ± 2.45                          |
| CF23                | 26.53 ± 2.51                          |
| CF26                | 30.57 ± 0.45                          |
| CF51                | 24.35 ± 0.46                          |
| CF53                | 29.06 ± 2.37                          |
| CF56                | 35.81 ± 3.27                          |

Values are shown as means ± sd (n = 3).
